# Supplementary material for: The β-Secretase Substrate Seizure 6–Like Protein (SEZ6L) Controls Motor Functions in Mice
Source: PubMed Central journal article supplement (PMC8857007; doi:10.1007/s12035-021-02660-y), 2021-12-27
Supplement: 12035_2021_2660_MOESM1_ESM.pdf [file 12035_2021_2660_MOESM1_ESM.pdf]

## **Supplementary File**

### **The $\beta$ -secretase substrate Seizure 6-like protein (SEZ6L) controls motor functions in mice**

Emma Ong-Pålsson\*, Jasenka Rudan Njavro\*, Yvette Wilson, Martina Pighi, Andree Schmidt, Stephan A. Müller, Michael Meyer, Jana Hartmann, Marc Aurel Busche, Jenny M. Gunnarsen, Kathryn M. Munro\*\* and Stefan F. Lichtenthaler\*\*

Supplementary Table 1 is provided as a separate Microsoft Excel file

**Supplementary Table 2: DigiGait indices analysed with 2-way ANOVA with genotype and sex as factors to identify parameter changes that may be sex-specific.** 15cm/s: WT n = 24 (9 male, 15 female), SEZ6L het n = 29 (14 male, 15 female) and SEZ6L KO n = 23 (15 male, 8 female). 25cm/s: WT n = 19 (6 male, 13 female), SEZ6L het n = 28 (13 male, 15 female) and SEZ6L KO n = 20 (13 male, 7 female). n.s. = not significant (p>0.05).

| <b>DigiGait indices</b>    | <b>Treadmill speed</b> | <b>Examination of forelimb/paw or hindlimb/paw</b> | <b>Effect of genotype: p-value</b> | <b>Effect of sex: p-value</b> | <b>Interaction: p-value</b> |
|----------------------------|------------------------|----------------------------------------------------|------------------------------------|-------------------------------|-----------------------------|
| Stance width (cm)          | 15 cm/s                | Between forelimbs                                  | n.s.                               | n.s.                          | n.s.                        |
|                            |                        | Between hindlimbs                                  | n.s.                               | n.s.                          | n.s.                        |
|                            | 25 cm/s                | Between forelimbs                                  | n.s.                               | n.s.                          | n.s.                        |
|                            |                        | Between hindlimbs                                  | n.s.                               | n.s.                          | n.s.                        |
| Stride length (cm)         | 15 cm/s                | Forelimb average                                   | n.s.                               | n.s.                          | n.s.                        |
|                            |                        | Hindlimb average                                   | n.s. (0.0509)                      | n.s.                          | n.s.                        |
|                            | 25 cm/s                | Forelimb average                                   | 0.0133                             | n.s.                          | n.s.                        |
|                            |                        | Hindlimb average                                   | 0.0061                             | n.s.                          | n.s.                        |
| Stride frequency (steps/s) | 15 cm/s                | Forelimb average                                   | n.s.                               | n.s.                          | n.s.                        |
|                            |                        | Hindlimb average                                   | 0.0200                             | n.s.                          | n.s.                        |
|                            | 25 cm/s                | Forelimb average                                   | 0.0197                             | n.s.                          | n.s.                        |
|                            |                        | Hindlimb average                                   | 0.0059                             | n.s.                          | n.s.                        |
| Stride time (s)            | 15 cm/s                | Forelimb average                                   | n.s.                               | n.s.                          | n.s.                        |
|                            |                        | Hindlimb average                                   | 0.0085                             | n.s.                          | n.s.                        |
|                            | 25 cm/s                | Forelimb average                                   | 0.0129                             | n.s.                          | n.s.                        |
|                            |                        | Hindlimb average                                   | 0.0041                             | n.s.                          | n.s.                        |
| Stance duration (s)        | 15 cm/s                | Forelimb average                                   | 0.0356                             | n.s.                          | n.s.                        |
|                            |                        | Hindlimb average                                   | 0.0324                             | n.s.                          | n.s.                        |
|                            | 25 cm/s                | Forelimb average                                   | 0.0040                             | n.s.                          | n.s.                        |
|                            |                        | Hindlimb average                                   | 0.0319                             | 0.0198                        | n.s.                        |
| Swing duration (s)         | 15 cm/s                | Forelimb average                                   | n.s.                               | n.s.                          | n.s.                        |
|                            |                        | Hindlimb average                                   | 0.0047                             | n.s.                          | n.s.                        |
|                            | 25 cm/s                | Forelimb average                                   | n.s.                               | n.s.                          | n.s.                        |
|                            |                        | Hindlimb average                                   | 0.0092                             | n.s.                          | n.s.                        |
| Propulsion phase (s)       | 15 cm/s                | Forelimb average                                   | n.s.                               | n.s.                          | n.s.                        |
|                            |                        | Hindlimb average                                   | n.s.                               | n.s.                          | n.s.                        |
|                            | 25 cm/s                | Forelimb average                                   | n.s.                               | 0.0054                        | n.s.                        |
|                            |                        | Hindlimb average                                   | n.s.                               | 0.0017                        | n.s.                        |
| Brake duration (s)         | 15 cm/s                | Forelimb average                                   | 0.0299                             | n.s.                          | n.s.                        |
|                            |                        | Hindlimb average                                   | 0.0243                             | n.s.                          | n.s.                        |
|                            | 25 cm/s                | Forelimb average                                   | n.s.                               | n.s.                          | n.s.                        |
|                            |                        | Hindlimb average                                   | n.s.                               | n.s.                          | n.s.                        |

**Supplementary Table 3: SEZ6L KO mice exhibit gait differences as assessed by treadmill walking at 15cm/s.** p-values generated from 1-way ANOVA with male and female data pooled unless otherwise indicated. Tukey's multiple comparisons test significant differences between WT vs. SEZ6L KO indicated with an asterisk (\*), SEZ6L het vs. SEZ6L KO indicated with a hash (#), and WT vs. SEZ6L het with a \$. \* $p \leq 0.05$ ; \*\* $p \leq 0.01$ ; \*\*\* $p \leq 0.001$  (or equivalent symbol). Data presented as mean  $\pm$  SEM. WT n = 24 (9 male, 15 female), SEZ6L het n = 29 (14 male, 15 female) and SEZ6L KO n = 24 (15 male, 9 female). n.s. = not significant ( $p > 0.05$ ).

| DigiGait indices           | Treadmill speed | Examination of forelimb/paw or hindlimb/paw | p-value | WT                | SEZ6L het            | SEZ6L KO                    |
|----------------------------|-----------------|---------------------------------------------|---------|-------------------|----------------------|-----------------------------|
| Stance width (cm)          | 15 cm/s         | Between forelimbs                           | n.s.    | 1.713 $\pm$ 0.045 | 1.734 $\pm$ 0.032    | 1.733 $\pm$ 0.069           |
|                            |                 | Between hindlimbs                           | n.s.    | 3.208 $\pm$ 0.061 | 3.255 $\pm$ 0.048    | 3.075 $\pm$ 0.056           |
| Stride length (cm)         | 15 cm/s         | Forelimb average                            | n.s.    | 5.13 $\pm$ 0.212  | 5.07 $\pm$ 0.072     | 5.43 $\pm$ 0.166            |
|                            |                 | Hindlimb average                            | 0.0404  | 5.14 $\pm$ 0.177  | 5.08 $\pm$ 0.086     | 5.55 $\pm$ 0.153 #          |
| Stride frequency (steps/s) | 15 cm/s         | Forelimb average                            | n.s.    | 3.11 $\pm$ 0.080  | 3.02 $\pm$ 0.044     | 2.87 $\pm$ 0.091            |
|                            |                 | Hindlimb average                            | 0.0109  | 3.10 $\pm$ 0.073  | 3.04 $\pm$ 0.052     | 2.81 $\pm$ 0.080 * and #    |
| Stride time (s)            | 15 cm/s         | Forelimb average                            | 0.0399  | 0.332 $\pm$ 0.008 | 0.339 $\pm$ 0.005    | 0.361 $\pm$ 0.011 *         |
|                            |                 | Hindlimb average                            | 0.0044  | 0.333 $\pm$ 0.008 | 0.339 $\pm$ 0.006    | 0.370 $\pm$ 0.010 ** and #  |
| Stance duration (s)        | 15 cm/s         | Forelimb average                            | 0.0188  | 0.221 $\pm$ 0.006 | 0.228 $\pm$ 0.003    | 0.244 $\pm$ 0.007 *         |
|                            |                 | Hindlimb average                            | 0.0160  | 0.241 $\pm$ 0.006 | 0.246 $\pm$ 0.004    | 0.263 $\pm$ 0.006 *         |
| Swing duration (s)         | 15 cm/s         | Forelimb average                            | n.s.    | 0.111 $\pm$ 0.004 | 0.110 $\pm$ 0.003    | 0.118 $\pm$ 0.004           |
|                            |                 | Hindlimb average                            | 0.0036  | 0.092 $\pm$ 0.003 | 0.093 $\pm$ 0.003    | 0.107 $\pm$ 0.004 ** and ## |
| Propulsion phase (s)       | 15 cm/s         | Forelimb average                            | n.s.    | 0.151 $\pm$ 0.005 | 0.149 $\pm$ 0.003    | 0.157 $\pm$ 0.007           |
|                            |                 | Hindlimb average                            | n.s.    | 0.192 $\pm$ 0.006 | 0.182 $\pm$ 0.005    | 0.201 $\pm$ 0.008           |
| Brake duration (s)         | 15 cm/s         | Forelimb average                            | 0.0385  | 0.071 $\pm$ 0.003 | 0.0795 $\pm$ 0.003   | 0.087 $\pm$ 0.006 *         |
|                            |                 | Hindlimb average                            | 0.0250  | 0.049 $\pm$ 0.002 | 0.063 $\pm$ 0.004 \$ | 0.061 $\pm$ 0.005           |

## P21 cerebellar proteome (n=7)

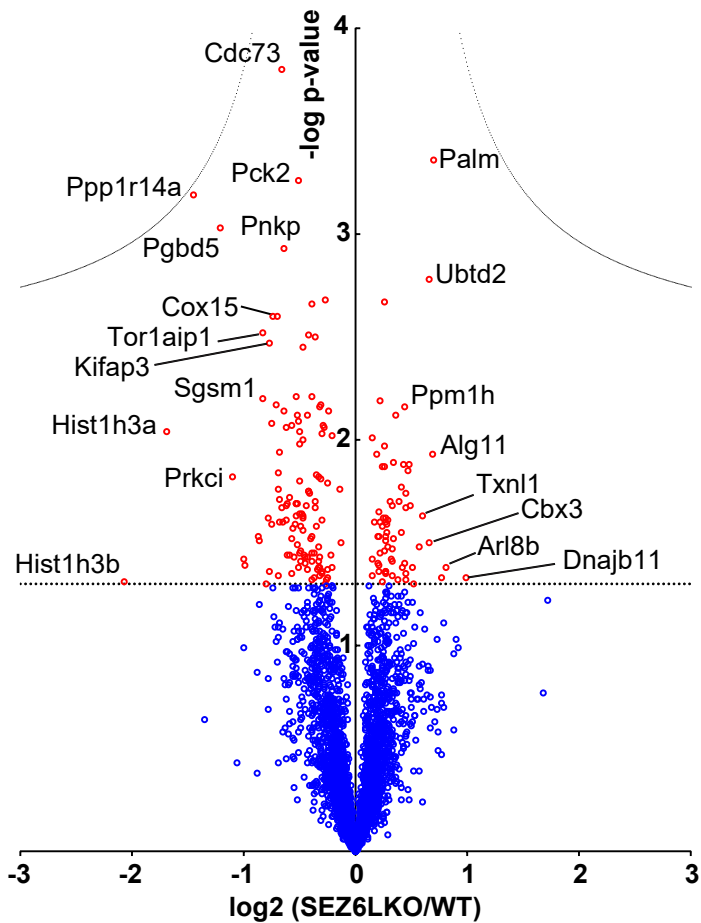

### Supplementary Fig. 1

SEZ6L KO cerebellar proteome of the young mice. SEZ6L KO and WT cerebella at postnatal day 21 (P21) with seven biological replicates. The mean protein log<sub>2</sub>-transformed fold changes of each protein is plotted against the negative log<sub>10</sub>-transformed p-value. Proteins with a t-test p-value < 0.05 are shown as red circles, while the proteins with the p-value > 0.05 are shown as blue circles. Hyperbolic curve represents permutation-based FDR correction (FDR < 0.05, s<sub>0</sub> = 0.1). The straight dotted line that crosses the y-axis at the 1.3 represents the p-value of 0.05.

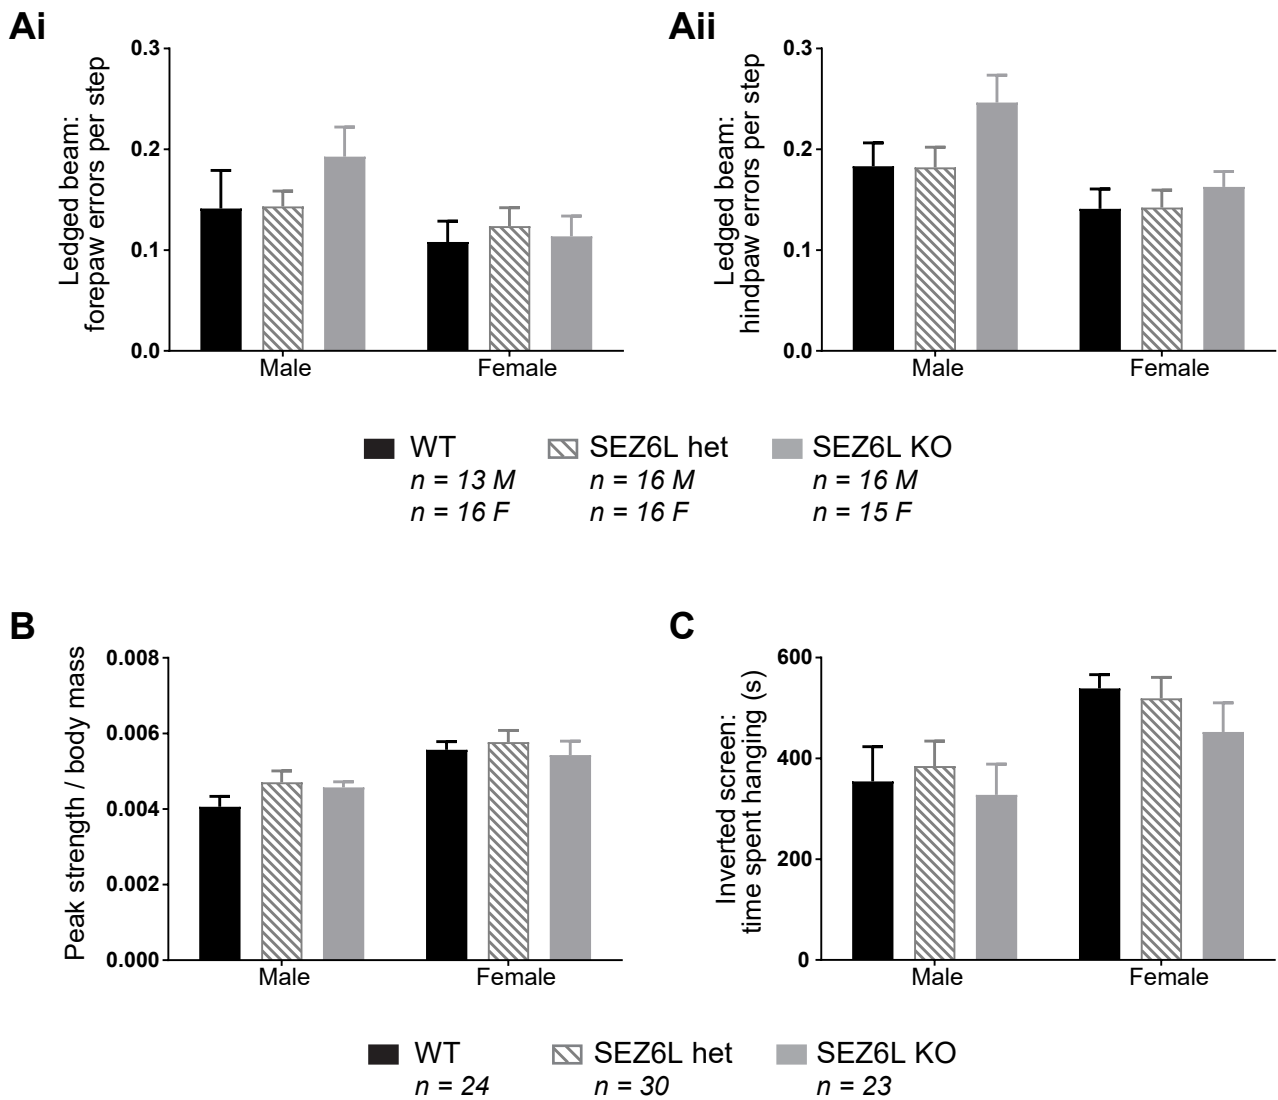

### Supplementary Fig. 2

SEZ6L KO mice exhibit normal locomotor precision and muscular strength. WT, SEZ6L het and SEZ6L KO mice behave similarly in the ledged beam task (Ai, ii: 1-way ANOVA within sex), forelimb grip strength test (B: 1-way ANOVA within sex) and the four limb hanging inverted screen test (C: 1-way ANOVA and Kruskal-Wallis test within sex). Data shown as mean  $\pm$  SEM. Mice tested on the ledged beam: WT n = 29 (13 male, 16 female), 32 SEZ6L hets (16 male, 16 female) and 31 SEZ6L KOs (16 male, 15 female). Mice tested on grip strength / inverted screen test: 24 WTs (9 male, 15 female), 30 SEZ6L hets (15 male, 15 female), 23 SEZ6L KOs (15 male, 8 female)
